# Supplementary material for: N-Iodophthalimide as a halogen bond donor, a comparison with N-iodosuccinimide and N-iodosaccharin
Source: Royal Society of Chemistry journal article supplement (doi:10.1039/d4ce00654b), 2024-01-01
Supplement: d4ce00654b1.pdf [file d4ce00654b1.pdf]

## **N-iodophtalimide as halogen bond donor, a comparison with N-iodosuccinimide and N-iodosaccharin**

le-Rang Jeon, Olivier Jeannin, Frédéric Barrière, Antoine Robert and Marc Fourmigué\*

*UnivRennes, CNRS, ISCR (Institut des Sciences Chimiques de Rennes), Campus de Beaulieu, Rennes, 35000, France*

### **SUPPLEMENTARY INFORMATION**

## 1. Synthesis and crystal growth

Reagents were obtained from commercial suppliers and used without further purification. Solvents were dried using commercial solvent purification system from Inert Technology.

### *Synthesis.*

**N-iodophthalimide (NIPht).**<sup>1</sup> Phthalimide (1 g, 6.8 mmol),  $\text{PhI}(\text{OAc})_2$  (1.05g, 3.26 mmol) and diiodine (0.9 g, 3.55 mmol) are dissolved in  $\text{CH}_3\text{CN}$  (30 mL). The reaction mixture is then stirred at RT overnight. The yellow solution is then concentrated under reduced pressure. The yellow oil is dispersed in  $\text{CCl}_4$  (30 mL) and stirred at 0°C during 15 min. The precipitate is filtered and the white solid washed with cold  $\text{CCl}_4$  and dried under vacuum (1.83 g, 6.72 mmol, 99% yield).  $^1\text{H}$  NMR (300 MHz,  $\text{CD}_3\text{CN}$ )  $\delta_{\text{H}} = 7.75$  (m, 4H). Crystals were obtained from  $\text{CH}_2\text{Cl}_2$ /hexane.

### *Co-crystal preparations*

**(NIPht)•DMAP.** NIPht (7.0 mg, 0.026 mmol) and 4-dimethylaminopyridine (DMAP, 6.5 mg, 0.053 mmol) were solubilized in DCM (10 mL). Diffusion of pentane vapor into the DCM solution at ambient temperature afforded colorless block-shaped crystals suitable for single-crystal X-ray diffraction after 2 weeks.

**$\alpha$ -(NIPht)<sub>2</sub>(*p*-bipy).** NIPht (6.0 mg, 0.022 mmol) and 4,4'-bipyridine (2.0 mg, 0.0013 mmol) were solubilized in DCM (1 mL). Diffusion of pentane vapor into the DCM solution at ambient temperature afforded colorless prism-shaped crystals suitable for single-crystal X-ray diffraction after 3 weeks.

**$\beta$ -(NIPht)<sub>2</sub>(*p*-bipy).** NIPht (4.0 mg, 0.015 mmol) and 4,4'-bipyridine (50 mg, 0.013 mmol) were solubilized in DCM (10 mL). Layering of pentane (10 mL) over the DCM solution at 4°C afforded colorless prism-shaped crystals suitable for single-crystal X-ray diffraction after 2 weeks.

**(NISacc)<sub>2</sub>(*p*-bipy).** NISacc (7.5 mg, 0.024 mmol) and 4,4'-bipyridine (16 mg, 0.010 mmol) were solubilized in DCM (1 mL). The resulting mixture was filtered through celite to remove insoluble residues. Layering of hexane (1 mL) over the filtrate at ambient temperature afforded colorless prism-shaped crystals suitable for single-crystal X-ray diffraction after 1 week.

**(NIPht)<sub>2</sub>(*o*-bipy).** NIPht (6.8 mg, 0.025 mmol) and 2,2'-bipyridine (16 mg, 0.010 mmol) were solubilized in DCM (1.5 mL). The resulting mixture was filtered through celite to

remove insoluble residues. Layering of hexane (2 mL) over the filtrate at 4°C afforded colorless prism-shaped crystals. Despite several trials, the quality of the X-ray data collection was too poor to allow for a complete refinement. The compound crystallizes in the triclinic system, space group P1, with two crystallographically independent (NIPht)<sub>2</sub>(*o*-bipy) adducts in the unit cell. They both exhibit structural characteristics closely related to those observed in the analogous *o*-Me<sub>2</sub>bipy analog. Crystal data: C<sub>26</sub>H<sub>16</sub>I<sub>2</sub>N<sub>4</sub>O<sub>4</sub>, M = 702.23 g mol<sup>-1</sup>, triclinic, space group P1, a = 4.105(2), b = 14.432(6), c = 21.013(9) Å, α = 89.234(12), β = 84.512(15), γ = 81.820(14)°, V = 1226.6(9) Å<sup>3</sup>, Z = 2, T = 296(2) K.

**(NIPht)<sub>2</sub>(*o*-Me<sub>2</sub>bipy).** NIPht (6.0 mg, 0.022 mmol) and 5,5'-dimethyl-2,2'-bipyridine (2 mg, 0.011 mmol) were solubilized in DCM (6 mL). Diffusion of pentane vapor into the DCM solution at ambient temperature afforded colorless prism-shaped crystals suitable for single-crystal X-ray diffraction after 10 days.

**(NISucc)<sub>2</sub>(*o*-bipy).** NISucc (11.3 mg, 0.050 mmol) and 2,2'-bipyridine (4.0 mg, 0.026 mmol) were solubilized in DCM (5 mL). Diffusion of pentane vapor into the DCM solution at ambient temperature afforded colorless needle-shaped crystals suitable for single-crystal X-ray diffraction after 2 weeks.

**(NISucc)<sub>2</sub>(*o*-Me<sub>2</sub>bipy).** NISucc (13.5 mg, 0.060 mmol) and 5,5'-dimethyl-2,2'-bipyridine (5.7 mg, 0.031 mmol) were solubilized in DCM (6 mL). Layering of pentane over the DCM solution at 4°C afforded colorless needle-shaped crystals suitable for single-crystal X-ray diffraction after 2 weeks.

**(NISacc)<sub>2</sub>(*o*-bipy).** NISacc (3.0 mg, 0.010 mmol) and 2,2'-bipyridine (1 mg, 0.006 mmol) were solubilized in DCM (6 mL). Layering of pentane (6 mL) over the DCM solution at 4°C afforded colorless prism-shaped crystals suitable for single-crystal X-ray diffraction after 1 month.

**[K(18-crown-6)](phthalimide)•N-iodophthalimide.** NIPht (30 mg, 0.110 mmol), potassium phthalimide (30 mg, 0.162 mmol) and 18-crown-6 (42 mg, 0.159 mmol) were solubilized in DCM (1 mL). The resulting mixture was filtered through Celite to remove insoluble residues. Layering of hexane (2 mL) over the filtrate at 4°C afforded colorless prism-shaped crystals suitable for single-crystal X-ray diffraction after 1 week.

## 2. Crystallographic studies

**Table S1.** Crystallographic data<sup>a,b</sup>

|                                             | <b>NIPht</b>                                          | <b>(NIPht)•DMAP</b>                                            | <b>α-(NIPht)<sub>2</sub>(p-bipy)</b>                                         |
|---------------------------------------------|-------------------------------------------------------|----------------------------------------------------------------|------------------------------------------------------------------------------|
| CCDC                                        | 2366101                                               | 2366102                                                        | 2366103                                                                      |
| Formulae                                    | C <sub>8</sub> H <sub>4</sub> INO <sub>2</sub>        | C <sub>15</sub> H <sub>14</sub> IN <sub>3</sub> O <sub>2</sub> | C <sub>26</sub> H <sub>16</sub> I <sub>2</sub> N <sub>4</sub> O <sub>4</sub> |
| FW (g.mol <sup>-1</sup> )                   | 273.02                                                | 395.19                                                         | 702.23                                                                       |
| System                                      | orthorhombic                                          | monoclinic                                                     | monoclinic                                                                   |
| Space group                                 | <i>P</i> 2 <sub>1</sub> 2 <sub>1</sub> 2 <sub>1</sub> | <i>P</i> 2 <sub>1</sub> /n                                     | <i>P</i> 2 <sub>1</sub> /n                                                   |
| a (Å)                                       | 4.9049(2)                                             | 9.2802(9)                                                      | 4.8622(3)                                                                    |
| b (Å)                                       | 7.0364(2)                                             | 11.8980(11)                                                    | 33.380(3)                                                                    |
| c (Å)                                       | 24.1144(8)                                            | 13.5467(11)                                                    | 8.0329(5)                                                                    |
| α (deg)                                     | 90.00                                                 | 90.00                                                          | 90.00                                                                        |
| β (deg)                                     | 90.00                                                 | 100.135(3)                                                     | 104.989(3)                                                                   |
| γ (deg)                                     | 90.00                                                 | 90.00                                                          | 90.00                                                                        |
| V (Å <sup>3</sup> )                         | 832.26(5)                                             | 1472.4(2)                                                      | 1259.38(16)                                                                  |
| T (K)                                       | 296(2)                                                | 150(2)                                                         | 296(2)                                                                       |
| Z                                           | 4                                                     | 4                                                              | 2                                                                            |
| Cryst. dim. (mm)                            | 0.14×0.06×0.04                                        | 0.14×0.08×0.04                                                 | 0.24×0.08×0.01                                                               |
| D <sub>calc</sub> (g.cm <sup>-3</sup> )     | 2.179                                                 | 1.783                                                          | 1.852                                                                        |
| μ (mm <sup>-1</sup> )                       | 3.801                                                 | 2.183                                                          | 2.537                                                                        |
| Absorption corr.                            | multi-scan                                            | multi-scan                                                     | multi-scan                                                                   |
| T <sub>min</sub> , T <sub>max</sub>         | 0.761, 0.859                                          | 0.811, 0.916                                                   | 0.784, 0.975                                                                 |
| Total refls                                 | 5953                                                  | 20445                                                          | 6306                                                                         |
| Uniq refls (R <sub>int</sub> )              | 1914 (0.027)                                          | 3308 (0.0249)                                                  | 2870 (0.0345)                                                                |
| Uniq refls (I > 2σ(I))                      | 1807                                                  | 3086                                                           | 2178                                                                         |
| R <sub>1</sub> , wR <sub>2</sub>            | 0.0271, 0.0559                                        | 0.016, 0.0381                                                  | 0.0447, 0.0777                                                               |
| R <sub>1</sub> , wR <sub>2</sub> (all data) | 0.0297, 0.0572                                        | 0.0182, 0.0399                                                 | 0.0669, 0.0838                                                               |
| GOF                                         | 1.069                                                 | 1.115                                                          | 1.043                                                                        |

<sup>a</sup>R<sub>1</sub> =  $\sum ||F_o| - |F_c|| / \sum |F_o|$ . <sup>b</sup>wR<sub>2</sub> =  $[\sum w(F_o^2 - F_c^2)^2] / [\sum w(F_o^2)^2]^{1/2}$ .

**Table S1 (continued).** Crystallographic data<sup>a,b</sup>

|                                             | $\beta$ -(NIPht) <sub>2</sub> ( <i>p</i> -bipy)                              | (NIPht) <sub>2</sub> ( <i>o</i> -Me <sub>2</sub> bipy),<br>CH <sub>2</sub> Cl <sub>2</sub>   | (NISacc) <sub>2</sub> ( <i>p</i> -bipy)                                                     |
|---------------------------------------------|------------------------------------------------------------------------------|----------------------------------------------------------------------------------------------|---------------------------------------------------------------------------------------------|
| CCDC                                        | 2366104                                                                      | 2366105                                                                                      | 2366106                                                                                     |
| Formulae                                    | C <sub>26</sub> H <sub>16</sub> I <sub>2</sub> N <sub>4</sub> O <sub>4</sub> | C <sub>29</sub> H <sub>22</sub> Cl <sub>2</sub> I <sub>2</sub> N <sub>4</sub> O <sub>4</sub> | C <sub>24</sub> H <sub>16</sub> I <sub>2</sub> N <sub>4</sub> O <sub>6</sub> S <sub>2</sub> |
| FW (g.mol <sup>-1</sup> )                   | 702.23                                                                       | 815.21                                                                                       | 774.33                                                                                      |
| System                                      | monoclinic                                                                   | orthorhombic                                                                                 | monoclinic                                                                                  |
| Space group                                 | <i>P</i> 2 <sub>1</sub> / <i>c</i>                                           | <i>P</i> ba2                                                                                 | <i>P</i> 2 <sub>1</sub> / <i>c</i>                                                          |
| a (Å)                                       | 7.5392(8)                                                                    | 25.6531(16)                                                                                  | 8.6873(9)                                                                                   |
| b (Å)                                       | 9.4310(10)                                                                   | 14.2270(8)                                                                                   | 9.2187(10)                                                                                  |
| c (Å)                                       | 17.2253(18)                                                                  | 4.1646(3)                                                                                    | 16.9914(16)                                                                                 |
| $\alpha$ (deg)                              | 90.00                                                                        | 90.00                                                                                        | 90.00                                                                                       |
| $\beta$ (deg)                               | 97.896(3)                                                                    | 90.00                                                                                        | 105.954(3)                                                                                  |
| $\gamma$ (deg)                              | 90.00                                                                        | 90.00                                                                                        | 90.00                                                                                       |
| V (Å <sup>3</sup> )                         | 1213.1(2)                                                                    | 1519.94(17)                                                                                  | 1308.4(2)                                                                                   |
| T (K)                                       | 296(2)                                                                       | 296(2)                                                                                       | 296(2)                                                                                      |
| Z                                           | 2                                                                            | 2                                                                                            | 2                                                                                           |
| Cryst. dim. (mm)                            | 0.10×0.09×0.03                                                               | 0.23×0.08×0.04                                                                               | 0.23×0.18×0.12                                                                              |
| D <sub>calc</sub> (g.cm <sup>-3</sup> )     | 1.922                                                                        | 1.781                                                                                        | 1.966                                                                                       |
| $\mu$ (mm <sup>-1</sup> )                   | 2.634                                                                        | 2.286                                                                                        | 2.611                                                                                       |
| Absorption corr.                            | multi-scan                                                                   | multi-scan                                                                                   | multi-scan                                                                                  |
| T <sub>min</sub> , T <sub>max</sub>         | 0.768, 0.924                                                                 | 0.817, 0.919                                                                                 | 0.575, 0.731                                                                                |
| Total refls                                 | 2727                                                                         | 13219                                                                                        | 28084                                                                                       |
| Uniq refls (R <sub>int</sub> )              | 2727 (0.048)                                                                 | 3449 (0.0542)                                                                                | 28084 (0.0553)                                                                              |
| Uniq refls (I > 2 $\sigma$ (I))             | 2216                                                                         | 2655                                                                                         | 22562                                                                                       |
| R <sub>1</sub> , wR <sub>2</sub>            | 0.0374, 0.0726                                                               | 0.040, 0.0759                                                                                | 0.0324, 0.0732                                                                              |
| R <sub>1</sub> , wR <sub>2</sub> (all data) | 0.0563, 0.0788                                                               | 0.0618, 0.0818                                                                               | 0.0474, 0.0828                                                                              |
| GOF                                         | 1.188                                                                        | 1.061                                                                                        | 0.907                                                                                       |

<sup>a</sup>R<sub>1</sub> =  $\sum ||F_o| - |F_c|| / \sum |F_o|$ . <sup>b</sup>wR<sub>2</sub> =  $[\sum (F_o^2 - F_c^2)^2] / [\sum (F_o^2)^2]^{1/2}$ .

**Table S1 (continued).** Crystallographic data<sup>a,b</sup>

|                                                           | (NISucc) <sub>2</sub> ( <i>o</i> -bipy)                                      | (NISucc) <sub>2</sub> ( <i>o</i> -Me <sub>2</sub> bipy)                      | (NISucc) <sub>2</sub> ( <i>o</i> -bipy)                                                     |
|-----------------------------------------------------------|------------------------------------------------------------------------------|------------------------------------------------------------------------------|---------------------------------------------------------------------------------------------|
| CCDC                                                      | 2366107                                                                      | 2366108                                                                      | 2366109                                                                                     |
| Formulae                                                  | C <sub>18</sub> H <sub>16</sub> I <sub>2</sub> N <sub>4</sub> O <sub>4</sub> | C <sub>20</sub> H <sub>20</sub> I <sub>2</sub> N <sub>4</sub> O <sub>4</sub> | C <sub>24</sub> H <sub>16</sub> I <sub>2</sub> N <sub>4</sub> O <sub>6</sub> S <sub>2</sub> |
| FW (g.mol <sup>-1</sup> )                                 | 606.15                                                                       | 634.2                                                                        | 774.33                                                                                      |
| System                                                    | monoclinic                                                                   | monoclinic                                                                   | triclinic                                                                                   |
| Space group                                               | <i>P</i> 2 <sub>1</sub> / <i>c</i>                                           | <i>P</i> 2 <sub>1</sub> / <i>c</i>                                           | <i>P</i> $\bar{1}$                                                                          |
| <i>a</i> (Å)                                              | 21.488(2)                                                                    | 8.4092(8)                                                                    | 8.0405(6)                                                                                   |
| <i>b</i> (Å)                                              | 10.0888(8)                                                                   | 16.8459(18)                                                                  | 12.0158(8)                                                                                  |
| <i>c</i> (Å)                                              | 9.4428(9)                                                                    | 15.5232(16)                                                                  | 17.3956(12)                                                                                 |
| $\alpha$ (deg)                                            | 90.00                                                                        | 90.00                                                                        | 94.170(2)                                                                                   |
| $\beta$ (deg)                                             | 90.324(3)                                                                    | 94.164(4)                                                                    | 102.710(2)                                                                                  |
| $\gamma$ (deg)                                            | 90.00                                                                        | 90.00                                                                        | 105.874(2)                                                                                  |
| <i>V</i> (Å <sup>3</sup> )                                | 2047.1(3)                                                                    | 2193.2(4)                                                                    | 1561.04(19)                                                                                 |
| <i>T</i> (K)                                              | 150(2)                                                                       | 150(2)                                                                       | 296(2)                                                                                      |
| <i>Z</i>                                                  | 4                                                                            | 4                                                                            | 2                                                                                           |
| Cryst. dim. (mm)                                          | 0.11×0.08×0.04                                                               | 0.19×0.08×0.02                                                               | 0.25×0.08×0.02                                                                              |
| <i>D</i> <sub>calc</sub> (g.cm <sup>-3</sup> )            | 1.967                                                                        | 1.921                                                                        | 1.647                                                                                       |
| $\mu$ (mm <sup>-1</sup> )                                 | 3.104                                                                        | 2.902                                                                        | 2.189                                                                                       |
| Absorption corr.                                          | multi-scan                                                                   | multi-scan                                                                   | multi-scan                                                                                  |
| <i>T</i> <sub>min</sub> , <i>T</i> <sub>max</sub>         | 0.742, 0.883                                                                 | 0.757, 0.944                                                                 | 0.810, 0.957                                                                                |
| Total refls                                               | 26687                                                                        | 37649                                                                        | 19283                                                                                       |
| Uniq refls ( <i>R</i> <sub>int</sub> )                    | 4638 (0.0247)                                                                | 5000 (0.0367)                                                                | 7101 (0.0444)                                                                               |
| Uniq refls ( <i>I</i> > 2 $\sigma$ ( <i>I</i> ))          | 4525                                                                         | 4791                                                                         | 4889                                                                                        |
| <i>R</i> <sub>1</sub> , <i>wR</i> <sub>2</sub>            | 0.0206, 0.0444                                                               | 0.0173, 0.0428                                                               | 0.0423, 0.0946                                                                              |
| <i>R</i> <sub>1</sub> , <i>wR</i> <sub>2</sub> (all data) | 0.0213, 0.0447                                                               | 0.0183, 0.0439                                                               | 0.0725, 0.1054                                                                              |
| GOF                                                       | 1.197                                                                        | 0.720                                                                        | 1.021                                                                                       |

<sup>a</sup>*R*<sub>1</sub> =  $\sum ||F_o| - |F_c|| / \sum |F_o|$ . <sup>b</sup>*wR*<sub>2</sub> =  $[\sum w(F_o^2 - F_c^2)^2] / [\sum w(F_o^2)^2]^{1/2}$ .

**Table S1 (continued).** Crystallographic data<sup>a,b</sup>

| <b>[K(18-c-6)][NPht-I-NPht]</b>             |                    |
|---------------------------------------------|--------------------|
| CCDC                                        | 2366110            |
| Formulae                                    | C28 H32 I K N2 O10 |
| FW (g.mol <sup>-1</sup> )                   | 722.55             |
| System                                      | triclinic          |
| Space group                                 | $P\bar{1}$         |
| a (Å)                                       | 9.9210(19)         |
| b (Å)                                       | 11.407(3)          |
| c (Å)                                       | 16.152(3)          |
| $\alpha$ (deg)                              | 102.724(8)         |
| $\beta$ (deg)                               | 99.561(7)          |
| $\gamma$ (deg)                              | 114.396(7)         |
| V (Å <sup>3</sup> )                         | 1554.3(6)          |
| T (K)                                       | 296(2)             |
| Z                                           | 2                  |
| Cryst. dim. (mm)                            | 0.34×0.10×0.08     |
| D <sub>calc</sub> (g.cm <sup>-3</sup> )     | 1.544              |
| $\mu$ (mm <sup>-1</sup> )                   | 1.221              |
| Absorption corr.                            | multi-scan         |
| T <sub>min</sub> , T <sub>max</sub>         | 0.864, 0.907       |
| Total refls                                 | 10644              |
| Uniq refls (R <sub>int</sub> )              | 6707 (0.022)       |
| Uniq refls (I > 2 $\sigma$ (I))             | 5270               |
| R <sub>1</sub> , wR <sub>2</sub>            | 0.0389, 0.0855     |
| R <sub>1</sub> , wR <sub>2</sub> (all data) | 0.0566, 0.0954     |
| GOF                                         | 1.042              |

<sup>a</sup>R<sub>1</sub> =  $\sum ||F_o| - |F_c|| / \sum |F_o|$ . <sup>b</sup>wR<sub>2</sub> =  $[\sum w(F_o^2 - F_c^2)^2] / [\sum w(F_o^2)^2]^{1/2}$ .

### 3. Theoretical calculations

DFT geometry optimizations of molecules or adducts were carried out as reported by Taylor *et al.*<sup>2</sup> using Gaussian 16 Revision A.03.<sup>3</sup> Namely, the B3LYP functional and the 6-31+G\*\* basis set for all atoms and the LANLdp basis set for iodine were used together with the default convergence criteria implemented in the program. GaussView 6.0.16 was used to generate figures.

(a)

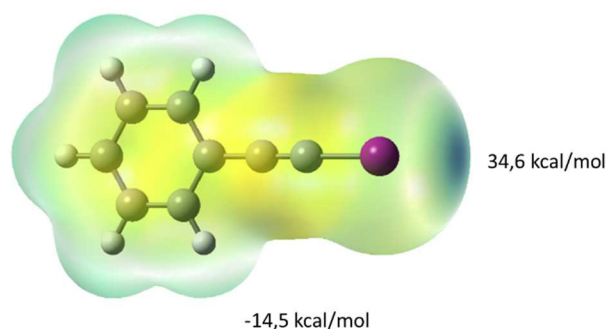

(b)

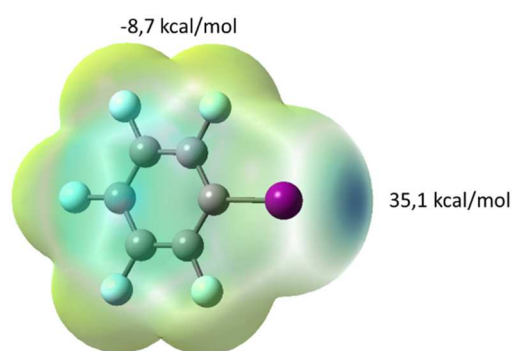

**Fig. S1** Molecular electrostatic potential surface at an isovalue of 0.001 of (a) Ph-C≡C-I and (b) C<sub>6</sub>F<sub>5</sub>-I (B3LYP/6-31G\*\*-LANLdp, Gaussian16) with extrema values indicated. Red indicates negative charge density and blue positive charge density. The full-scale range similar to the one used in Fig. 3, i.e. -0.0522/+0.0725 au (Hartrees), i.e. -32.8/+45.5 kcal/mol.



## 4. Complementary structural data

(a)

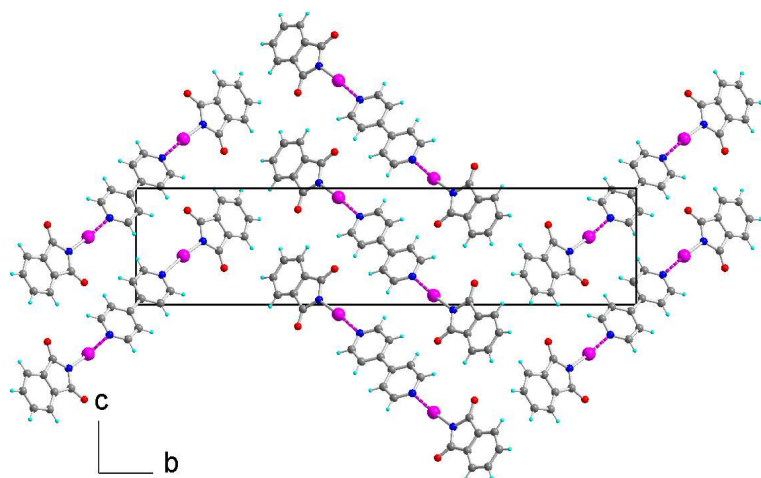

(b)

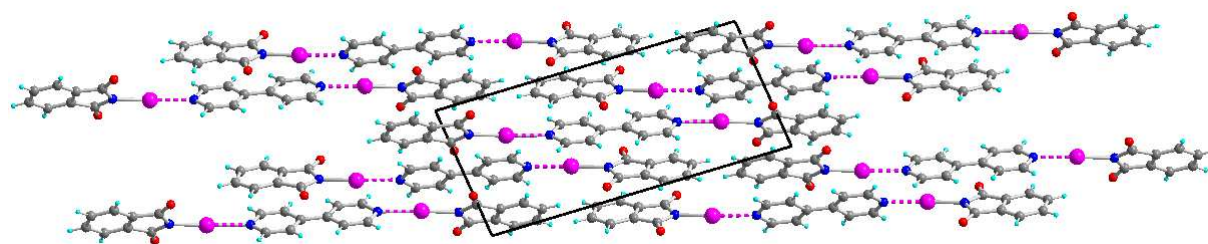

**Fig. S2** Solid state organization of (a)  $\alpha$ -(NIPht)<sub>2</sub>(*p*-bipy) adduct, and (b)  $\beta$ -(NIPht)<sub>2</sub>(*p*-bipy)

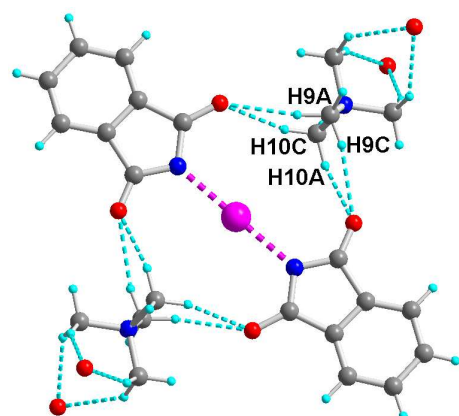

**Fig. S3** Detail of the C–H...O HB interactions (cyan dotted lines) in [Me<sub>4</sub>N][NPh<sub>t</sub>–I–NPh<sub>t</sub>].

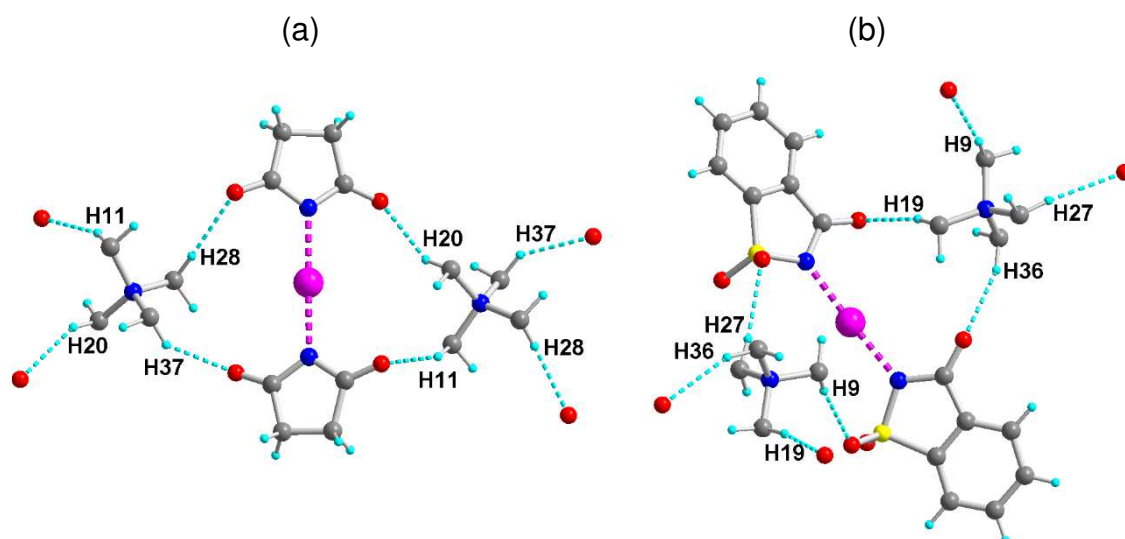

**Fig. S4** Details of the C–H...O HB interactions (cyan dotted lines) in (a)  $[\text{Bu}_4\text{N}][\text{NSucc-I-NSucc}]$  and (b)  $[\text{Bu}_4\text{N}][\text{NSacc-I-NSacc}]$ . Only the  $\alpha$ -methylene groups of the  $\text{Bu}_4\text{N}^+$  cations are shown for clarity.

**Table S2** Structural characteristics of the C–H...O hydrogen bond interactions in  $[\text{Me}_4\text{N}][\text{NPht-I-NPht}]$ ,  $[\text{Bu}_4\text{N}][\text{NSucc-I-NSucc}]$  and  $[\text{Bu}_4\text{N}][\text{NSacc-I-NSacc}]$ . See Figs. S3 and S4 for hydrogen atom numbering.

|                                               | H...O dist. (Å) | C–H...O ang. (°) | Ref. |
|-----------------------------------------------|-----------------|------------------|------|
| $[\text{Me}_4\text{N}][\text{NPht-I-NPht}]$   |                 |                  | 4    |
| C9–H9A...O2                                   | 2.481(10)       | 153.96(74)       |      |
| C9–H9C...O1                                   | 2.447(16)       | 144.87(87)       |      |
| C10–H10A...O1                                 | 2.522(11)       | 144.83(73)       |      |
| C10–H10C...O2                                 | 2.413(14)       | 156.40(81)       |      |
| $[\text{Bu}_4\text{N}][\text{NSucc-I-NSucc}]$ |                 |                  | 5    |
| C9–H11...O2                                   | 2.322(2)        | 155.19(11)       |      |
| C13–H20...O3                                  | 2.376(2)        | 150.0(1)         |      |
| C17–H28...O4                                  | 2.382(1)        | 170.76(11)       |      |
| C21–H37...O1                                  | 2.367(1)        | 144.62(10)       |      |
| $[\text{Bu}_4\text{N}][\text{NSacc-I-NSacc}]$ |                 |                  | 6    |
| C15–H9...O2                                   | 2.538(8)        | 167.88(22)       |      |
| C19–H19...O4                                  | 2.538(4)        | 166.96(20)       |      |
| C23–H27...O5                                  | 2.514(3)        | 174.39(21)       |      |
| C27–H36...O1                                  | 2.468(3)        | 158.98(21)       |      |

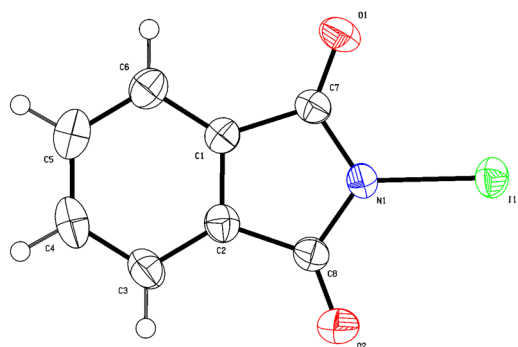

**Fig. S5** ORTEP drawing for NIPht

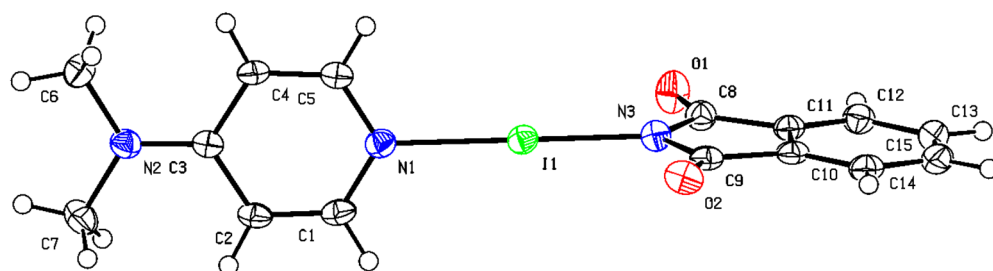

**Fig. S6** ORTEP drawing for (NIPht)•DMAP

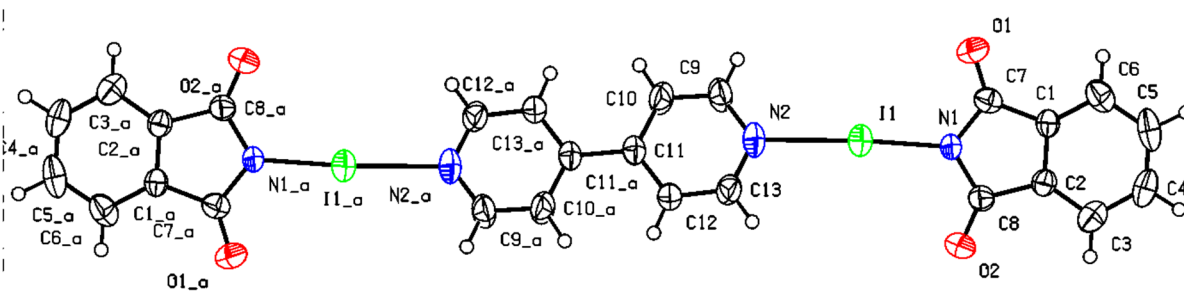

**Fig. S7** ORTEP drawing for  $\alpha$ -(NIPht)<sub>2</sub>(*p*-bipy)

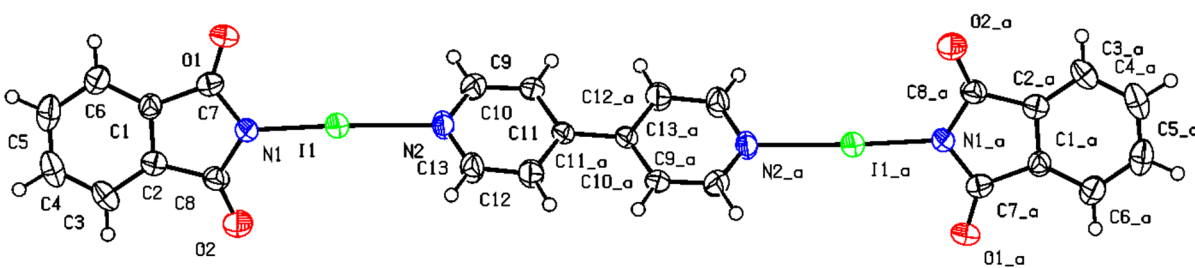

**Fig. S8** ORTEP drawing for  $\beta$ -(NIPht)<sub>2</sub>(*p*-bipy)

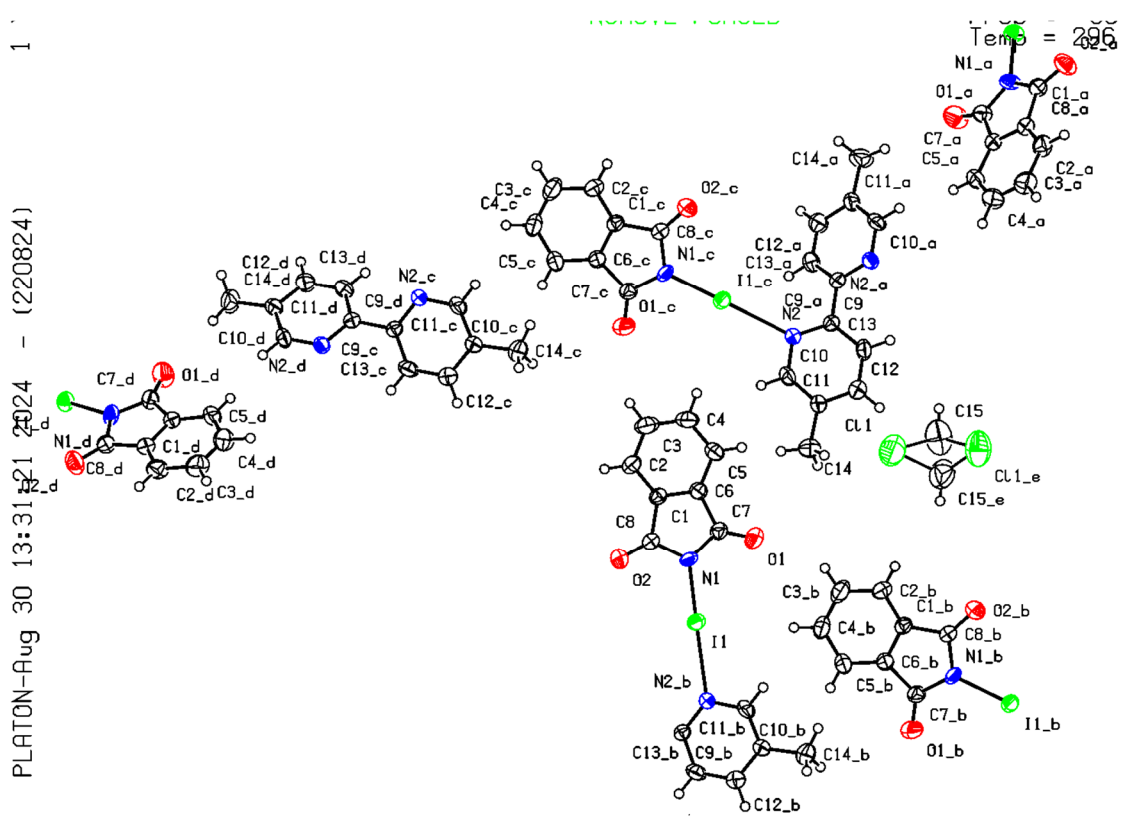

**Fig. S9** ORTEP drawing for  $(\text{NIPht})_2(o\text{-Me}_2\text{bipy}), \text{CH}_2\text{Cl}_2$

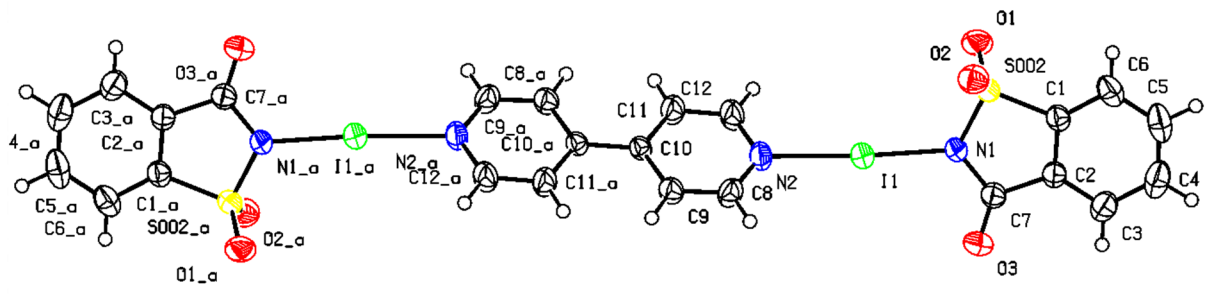

**Fig. S10** ORTEP drawing for  $(\text{NISacc})_2(p\text{-bipy})$

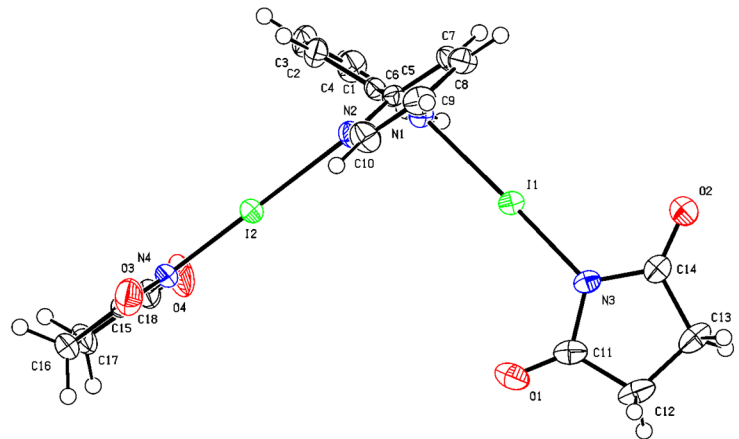

**Fig. S11** ORTEP drawing for  $(\text{NISucc})_2(o\text{-bipy})$

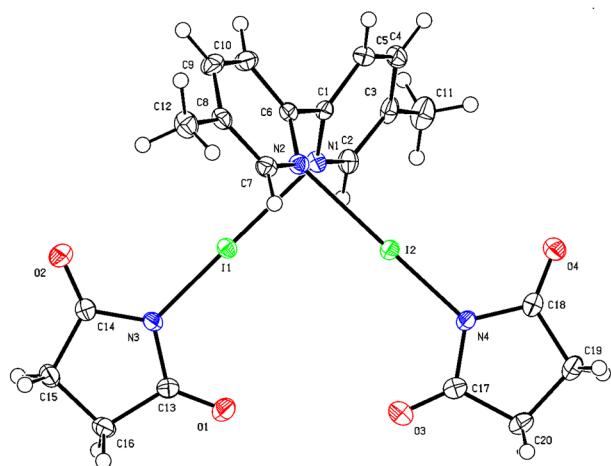

**Fig. S12** ORTEP drawing for  $(\text{NISucc})_2(o\text{-Me}_2\text{bipy})$

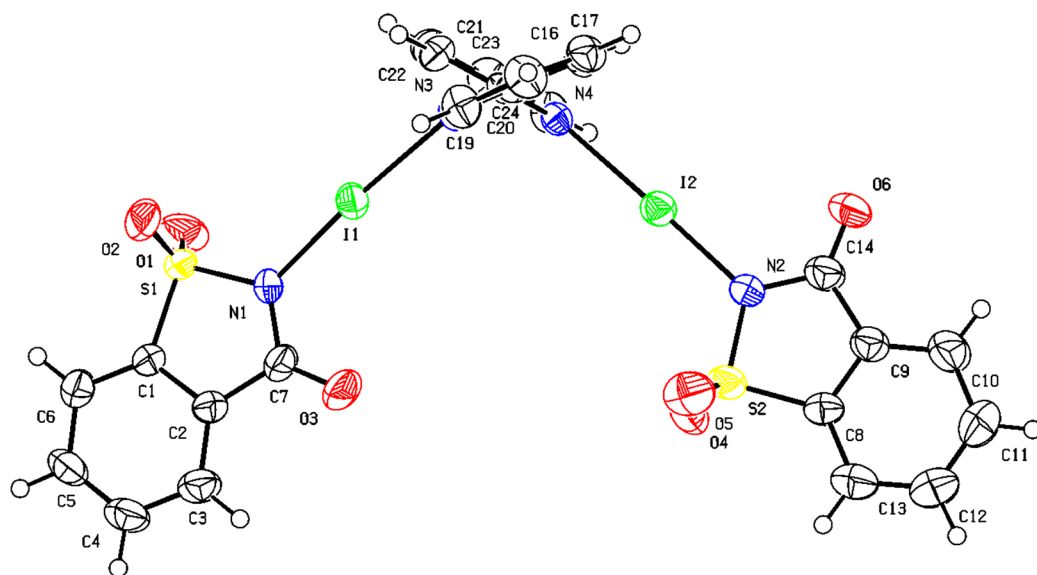

**Fig. S13** ORTEP drawing for  $(\text{NISucc})_2(o\text{-bipy})$

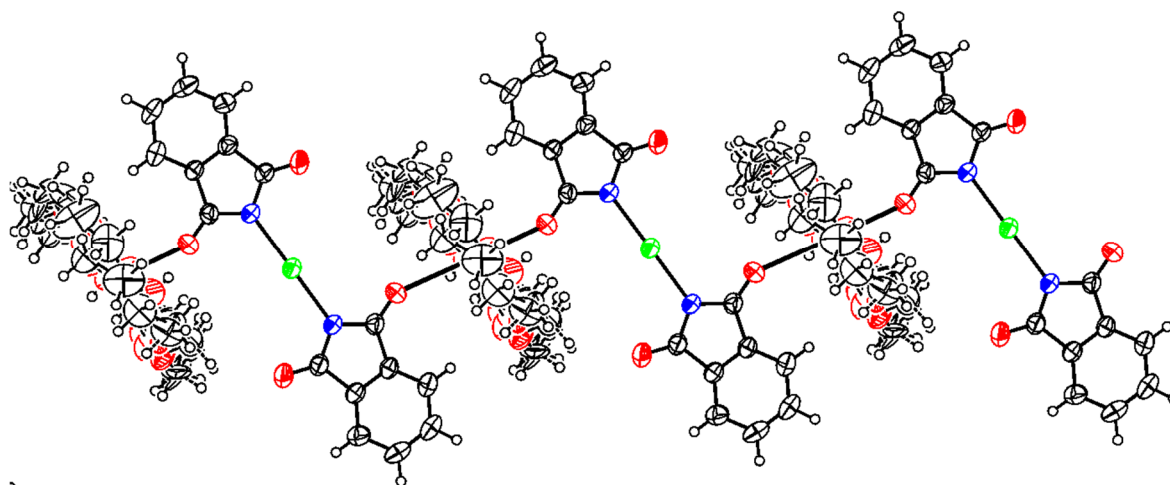

**Fig. S14** ORTEP drawing for  $[\text{K}(18\text{-c-6})][\text{NPh-I-NPh}]$

## References

- <sup>1</sup> A. Artaryan, A. Mardyukov, K. Kulbitski, I. Avigdori, G. A. Nisnevich, P. R. Schreiner and M. Gandelman, *J. Org. Chem.*, 2017, **82**, 7093–7100
- <sup>2</sup> Sarwar, M. G.; Dragisic, B.; Salsberg, L. J.; Gouliaras, C.; Taylor, M. S. *J. Am. Chem. Soc.* **2010**, *132*, 1646–1653.
- <sup>3</sup> Frisch, M. J.; Trucks, G. W.; Schlegel, H. B.; Scuseria, G. E.; Robb, M. A.; Cheeseman, J. R.; Scalmani, G.; Barone, V.; Petersson, G. A.; Nakatsuji, H.; Li, X.; Caricato, M.; Marenich, A. V.; Bloino, J.; Janesko, B. G.; Gomperts, R.; Mennucci, B.; Hratchian, H. P.; Ortiz, J. V.; Izmaylov, A. F.; Sonnenberg, J. L.; Williams-Young, D.; Ding, F.; Lipparini, F.; Egidi, F.; Goings, J.; Peng, B.; Petrone, A.; Henderson, T.; Ranasinghe, D.; Zakrzewski, V. G.; Gao, J.; Rega, N.; Zheng, G.; Liang, W.; Hada, M.; Ehara, M.; Toyota, K.; Fukuda, R.; Hasegawa, J.; Ishida, M.; Nakajima, T.; Honda, Y.; Kitao, O.; Nakai, H.; Vreven, T.; Throssell, K.; Montgomery, J. A., Jr.; Peralta, J. E.; Ogliaro, F.; Bearpark, M. J.; Heyd, J. J.; Brothers, E. N.; Kudin, K. N.; Staroverov, V. N.; Keith, T. A.; Kobayashi, R.; Normand, J.; Raghavachari, K.; Rendell, A. P.; Burant, J. C.; Iyengar, S. S.; Tomasi, J.; Cossi, M.; Millam, J. M.; Klene, M.; Adamo, C.; Cammi, R.; Ochterski, J. W.; Martin, R. L.; Morokuma, K.; Farkas, O.; Foresman, J. B.; Fox, D. J. Gaussian 16, Revision A03, Gaussian, Inc., Wallingford CT, 2016.
- <sup>4</sup> S. Yu, K. N. Truong, M. Siepmann, A. Siiri, C. Schumacher, J. S. Ward and K. Rissanen, *Cryst. Growth Des.*, 2023, **23**, 662–669
- <sup>5</sup> A. J. Guzmán Santiago, C. A. Brown, R. D. Sommer and E. A. Ison, *Dalton Trans.*, 2020, **49**, 16166–16174
- <sup>6</sup> N. Lucchetti, A. Tkacheva, S. Fantasia and K. Muñiz, *Adv. Synth. Catal.*, 2018, **360**, 3889–3893
